# Supplementary material for: Molecular dynamics simulations on ε-CL-20-based PBXs with added GAP and its derivative polymers
Source: Royal Society of Chemistry journal article supplement (doi:10.1039/c7ra13517c), 2018-01-01
Supplement: c7ra13517c1.pdf [file c7ra13517c1.pdf]

## Supplement Information

ID: RA-ART-12-2017-013517

TITLE: Molecular dynamics simulations on  $\epsilon$ -CL-20-based PBXs added by GAP and its derivative polymers

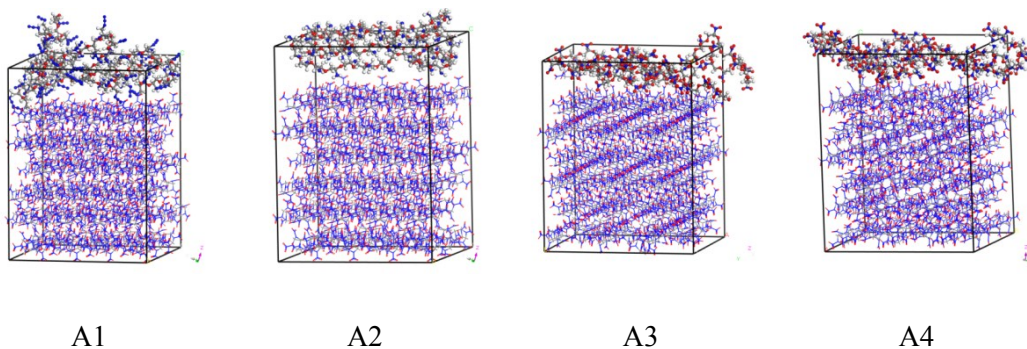

Fig.S1 The original periodic structures of A1, A2, A3, and A4.

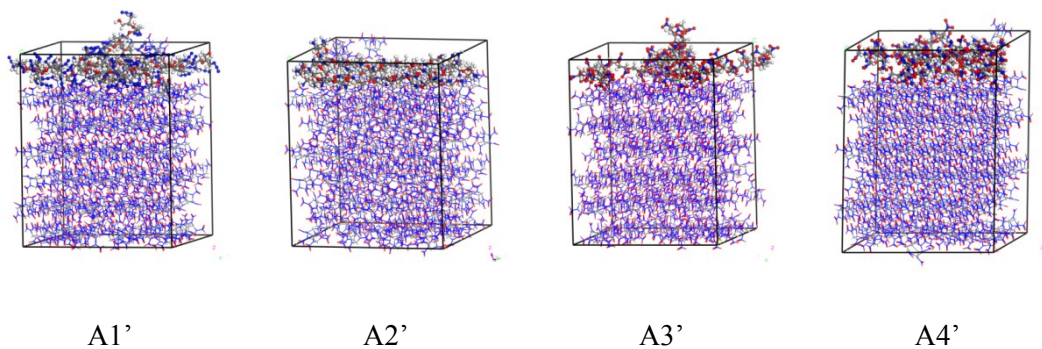

Fig.S2 The balanced PBX models at 298 K

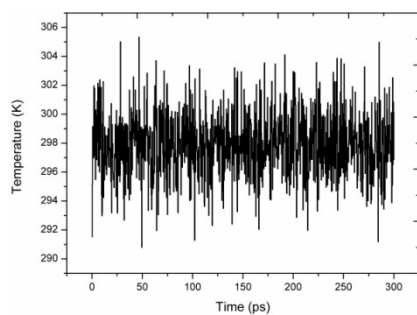

a

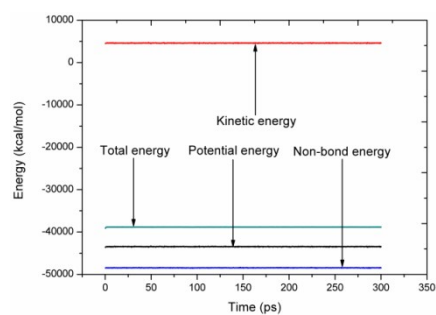

b

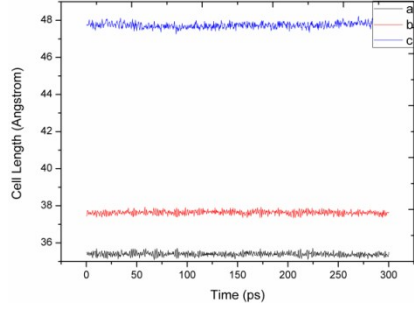

c

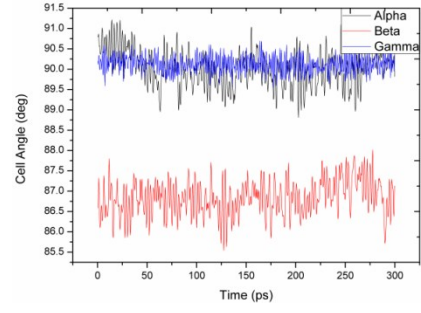

d

Fig.S3 The balanced parameters of system A1 at 298K

Table S1 Original parameters of CL-20(001) model (A) and PBX models (A1, A2, A3, A4)

| Parameters      | A      | A1     | A2     | A3     | A4     |
|-----------------|--------|--------|--------|--------|--------|
| $a$ (Å)         | 35.408 | 35.408 | 35.408 | 35.408 | 35.408 |
| $b$ (Å)         | 37.668 | 37.668 | 37.668 | 37.668 | 37.668 |
| $c$ (Å)         | 38.645 | 48.645 | 48.645 | 48.645 | 48.645 |
| $A$             | 90.000 | 90.000 | 90.000 | 90.000 | 90.000 |
| $\beta$         | 90.000 | 90.000 | 90.000 | 90.000 | 90.000 |
| $\gamma$        | 90.000 | 90.000 | 90.000 | 90.000 | 90.000 |
| Density         | 2.038  | 1.804  | 1.728  | 1.785  | 1.813  |
| Number of atoms | 5184   | 6078   | 5856   | 5856   | 6004   |

Table S2 The mechanical properties of PBXs at 248 K

|                 | A          | A1         | A2          | A3         | A4         |
|-----------------|------------|------------|-------------|------------|------------|
| $C_{11}$        | 17.99±0.11 | 13.21±0.12 | 10.19±0.05  | 14.93±0.08 | 14.14±0.09 |
| $C_{12}$        | 7.15±0.08  | 5.91±0.10  | 4.66±0.03   | 6.91±0.09  | 6.72±0.07  |
| $C_{13}$        | 5.85±0.10  | 2.52±0.12  | 5.31±0.05   | 4.24±0.07  | 2.79±0.07  |
| $C_{15}$        | -1.14±0.08 | -1.01±0.05 | 0.19± 0.04  | -1.03±0.05 | -1.08±0.05 |
| $C_{22}$        | 19.08±0.09 | 13.65±0.08 | 10.80± 0.04 | 15.39±0.09 | 15.67±0.07 |
| $C_{23}$        | 0.10±0.06  | 2.09±0.09  | 4.02±0.04   | 2.02±0.06  | 1.59±0.05  |
| $C_{25}$        | -1.50±0.06 | -0.59±0.04 | -0.14±0.02  | -0.88±0.04 | -0.99±0.04 |
| $C_{33}$        | 27.93±0.09 | 9.79±0.13  | 14.50±0.07  | 16.68±0.07 | 11.02±0.07 |
| $C_{35}$        | 3.98±0.07  | 1.00±0.05  | 1.91±0.05   | 1.96±0.04  | 0.82±0.03  |
| $C_{44}$        | 4.44±0.03  | 2.32±0.07  | 3.19±0.02   | 3.70±0.02  | 3.14±0.02  |
| $C_{46}$        | -2.37±0.03 | -0.95±0.07 | -1.00±0.02  | -1.80±0.03 | -1.61±0.02 |
| $C_{55}$        | 4.93±0.05  | 2.96±0.03  | 3.61±0.07   | 3.87±0.03  | 3.39±0.02  |
| $C_{66}$        | 8.01±0.05  | 5.86±0.08  | 5.07±0.04   | 6.82±0.06  | 7.38±0.03  |
| $E$             | 17.24      | 9.82       | 8.64        | 12.35      | 11.01      |
| $K$             | 10.05      | 6.19       | 7.37        | 8.11       | 6.77       |
| $G$             | 6.09       | 3.62       | 6.95        | 4.68       | 4.33       |
| $\gamma$        | 0.36       | 0.38       | 0.31        | 0.39       | 0.39       |
| $C_{12}-C_{44}$ | 2.71       | 3.59       | 1.46        | 3.21       | 3.21       |
| $K/G$           | 1.65       | 1.71       | 1.92        | 1.73       | 1.56       |

Remarks:

1. The unit of data in table 4 is GPa except Poisson's ratio and  $K/G$ ;
2. Other elastic coefficients unlisted are about 0.
